# Supplementary material
Source: Elsevier journal article supplement (https://www.sciencedirect.com/science/article/pii/S0213911113000733)
Supplement: mmc1 [file S0213911113000733:mmc1.doc]

**Appendix**

| Parameter | DF | Estimate | SE | Chi squared | p |
| --- | --- | --- | --- | --- | --- |
| *Intercept* | 1 | -4.08 | 0.30 | 190.11 | <.0001 |
| *Age* | 1 | 0.10 | 0.01 | 107.40 | <.0001 |
| *Sex* | 1 | 0.57 | 0.18 | 9.95 | 0.0016 |
| *Age*Sex* | 1 | 0.00 | 0.00 | 0.01 | 0.94 |
| *Age squared* | 1 | 0.00 | 0.00 | 56.82 | <.0001 |
| *Conditions* |  |  |  |  |  |
| Any anxiety | 1 | 1.05 | 0.14 | 59.75 | <.0001 |
| Depression | 1 | 1.90 | 0.11 | 303.72 | <.0001 |
| Arthritis | 1 | 1.74 | 0.08 | 461.91 | <.0001 |
| Cardiovascular | 1 | 0.34 | 0.10 | 12.92 | 0.0003 |
| Diabetes | 1 | 0.24 | 0.13 | 3.15 | 0.08 |
| Digestive | 1 | 2.91 | 0.09 | 1109.79 | <.0001 |
| Headache or migraine | 1 | 0.22 | 0.16 | 1.81 | 0.18 |
| Insomnia | 1 | 1.54 | 0.23 | 46.08 | <.0001 |
| Pain | 1 | 0.92 | 0.09 | 116.21 | <.0001 |
| Respiratory | 1 | 0.84 | 0.12 | 48.86 | <.0001 |
| *Education* |  |  |  |  |  |
| Basic | 1 | -0.55 | 0.05 | 111.34 | <.0001 |
| Secondary | 1 | -0.22 | 0.08 | 8.60 | 0.0034 |
| University | 1 | -0.69 | 0.08 | 72.86 | <.0001 |
| *Occupation* |  |  |  |  |  |
| Elementary | 1 | -1.60 | 0.46 | 12.15 | 0.0005 |
| Low-average prestige | 1 | -0.37 | 0.07 | 24.85 | <.0001 |
| High-average prestige | 1 | -0.62 | 0.07 | 76.83 | <.0001 |
| High prestige | 1 | 0.43 | 0.07 | 42.26 | <.0001 |
| *Morbidity* |  |  |  |  |  |
| Number of conditions (Ncd) | 1 | -0.42 | 0.09 | 22.05 | <.0001 |
| Ncd *any anxiety | 1 | 0.01 | 0.05 | 0.10 | 0.76 |
| Ncd *depression | 1 | -0.29 | 0.05 | 40.96 | <.0001 |
| Ncd *arthritis | 1 | -0.38 | 0.05 | 69.99 | <.0001 |
| Ncd *cardiovascular | 1 | 0.24 | 0.04 | 29.09 | <.0001 |
| Ncd *diabetes | 1 | 0.13 | 0.05 | 7.85 | 0.0051 |
| Ncd *digestive | 1 | -0.55 | 0.05 | 128.01 | <.0001 |
| Ncd *headache or migraine | 1 | 0.09 | 0.06 | 2.22 | 0.14 |
| Ncd *insomnia | 1 | -0.01 | 0.07 | 0.04 | 0.84 |
| Ncd *pain | 1 | -0.03 | 0.05 | 0.38 | 0.54 |
| Ncd *respiratory | 1 | -0.13 | 0.05 | 7.84 | 0.01 |

**Table I.** Parameters from best fit model (Poisson-like log-link). Outcome variable: full role limitation.

**Table II.** Parameters from best fit model (Gamma-like log-link). Outcome variable: Partial role limitation.

| Parameter | DF | Estimate | SE | Chi squared | p |
| --- | --- | --- | --- | --- | --- |
| *Intercept* | 1 | -0.21 | 0.18 | 1.34 | 0.25 |
| *Age* | 1 | 0.03 | 0.01 | 20.95 | <.0001 |
| *Sex* | 1 | 0.79 | 0.11 | 50.97 | <.0001 |
| *Age*Sex* | 1 | -0.01 | 0.00 | 27.21 | <.0001 |
| *Age squared* | 1 | 0.00 | 0.00 | 14.11 | 0.0002 |
| *Conditions* |  |  |  |  |  |
| Any anxiety | 1 | 0.28 | 0.12 | 5.45 | 0.02 |
| Depression | 1 | 0.94 | 0.15 | 37.11 | <.0001 |
| Arthritis | 1 | 0.48 | 0.12 | 17.25 | <.0001 |
| Cardiovascular | 1 | 0.07 | 0.09 | 0.57 | 0.45 |
| Diabetes | 1 | -0.48 | 0.13 | 13.75 | 0.0002 |
| Digestive | 1 | -0.25 | 0.23 | 1.16 | 0.28 |
| Headache or migraine | 1 | -0.04 | 0.11 | 0.15 | 0.70 |
| Insomnia | 1 | 0.28 | 0.35 | 0.66 | 0.42 |
| Pain | 1 | 0.70 | 0.08 | 72.83 | <.0001 |
| Respiratory | 1 | 0.40 | 0.09 | 18.05 | <.0001 |
| *Occupation* |  |  |  |  |  |
| Elementary | 1 | 0.74 | 0.09 | 62.68 | <.0001 |
| Low-average prestige | 1 | -0.14 | 0.07 | 4.18 | 0.04 |
| High-average prestige | 1 | -0.06 | 0.09 | 0.40 | 0.53 |
| High prestige | 1 | 0.06 | 0.08 | 0.54 | 0.46 |
| *Education* |  |  |  |  |  |
| Basic | 1 | -0.14 | 0.06 | 6.46 | 0.01 |
| Secondary | 1 | -0.53 | 0.07 | 55.72 | <.0001 |
| University | 1 | -0.34 | 0.07 | 26.05 | <.0001 |
| *Morbidity* |  |  |  |  |  |
| Number of conditions (Ncd) | 1 | -0.29 | 0.12 | 5.91 | 0.02 |
| Ncd *any anxiety | 1 | 0.13 | 0.08 | 2.80 | 0.09 |
| Ncd *depression | 1 | -0.07 | 0.09 | 0.72 | 0.40 |
| Ncd *arthritis | 1 | 0.19 | 0.07 | 6.49 | 0.01 |
| Ncd *cardiovascular | 1 | 0.19 | 0.07 | 7.76 | 0.01 |
| Ncd *diabetes | 1 | 0.10 | 0.09 | 1.28 | 0.26 |
| Ncd *digestive | 1 | 0.21 | 0.12 | 2.96 | 0.09 |
| Ncd *headache or migraine | 1 | 0.14 | 0.07 | 4.14 | 0.04 |
| Ncd *insomnia | 1 | 0.03 | 0.16 | 0.03 | 0.86 |
| Ncd *pain | 1 | -0.14 | 0.08 | 3.44 | 0.06 |
| Ncd *respiratory | 1 | -0.18 | 0.07 | 6.37 | 0.01 |
